## Correction: LncRNA-SVUGP2 suppresses progression of hepatocellular carcinoma

Jiangfeng Hu<sup>1,\*</sup>, Chenlin Song<sup>2,\*</sup>, Bensong Duan<sup>1,\*</sup>, Xiaoyan Zhang<sup>3</sup>, Dongliang Li<sup>4</sup>, Liang Zhu<sup>5</sup> and Hengjun Gao<sup>6,7</sup>

<sup>1</sup> Department of Gastroenterology, Tongji Hospital, Tongji University School of Medicine, Shanghai, China

<sup>2</sup> Division of Molecular Biology of the Cell II, German Cancer Research Center, DKFZ-ZMBH Alliance, Heidelberg, Germany

<sup>3</sup> Shanghai Engineering Center for Molecular Medicine, National Engineering Center for Biochip at Shanghai, Shanghai, China

<sup>4</sup> Department of Hepatobiliary Medicine, Fuzhou General Hospital of Nanjing Command, PLA, Fuzhou, China

<sup>5</sup> Department of Gastroenterology, Changzheng Hospital, Second Military Medical University, Shanghai, China

<sup>6</sup> National Engineering Center for Biochip at Shanghai, Shanghai, China

<sup>7</sup> Department of Gastroenterology, Institute of Digestive Diseases, Tongji University School of Medicine, Shanghai, China

\* These authors contributed equally to this work

**Published:** July 27, 2018

**Copyright:** Hu et al. This is an open-access article distributed under the terms of the Creative Commons Attribution License 3.0 (CC BY 3.0), which permits unrestricted use, distribution, and reproduction in any medium, provided the original author and source are credited.

**This article has been corrected:** The correct city name is given below:

<sup>7</sup> Department of Gastroenterology, Institute of Digestive Diseases, Tongji University School of Medicine, Shanghai, China

Original article: Oncotarget. 2017; 8:97835-97850. <https://doi.org/10.18632/oncotarget.18279>
